# Supplementary material for: HIV restriction factor APOBEC3G binds in multiple steps and conformations to search and deaminate single-stranded DNA
Source: eLife journal article supplement (doi:10.7554/elife.52649), 2019-12-18
Supplement: supp [file elife-52649-supp-v1.zip]

Archive with 16 entries (16 files):
- elife_poa_e52649_Figure_3_figure_supplement_1.pdf
- elife_poa_e52649_Figure_2_figure_supplement_1_source_data_1.pdf
- elife_poa_e52649_Figure_3_figure_supplement_2.pdf
- elife_poa_e52649_Figure_4_figure_supplement_1.pdf
- elife_poa_e52649_Source_code_1.zip
- elife_poa_e52649_Figure_5_figure_supplement_2.pdf
- elife_poa_e52649_Figure_2_source_data_1.pdf
- elife_poa_e52649_Figure_4_source_data_1.pdf
- elife_poa_e52649_Transparent_Reporting_File.pdf
- elife_poa_e52649_Figure_2_figure_supplement_1.pdf
- elife_poa_e52649_Figure_5_figure_supplement_1.pdf
- elife_poa_e52649_Figure_3_source_data_1.pdf
- elife_poa_e52649_Figure_5_source_data_1.pdf
- elife_poa_e52649_Source_code_2.zip
- elife_poa_e52649_Source_code_3.zip
- elife_poa_e52649_Figure_1_figure_supplement_1.pdf
