# Supplementary material for: HIV restriction factor APOBEC3G binds in multiple steps and conformations to search and deaminate single-stranded DNA
Source: eLife journal article supplement (doi:10.7554/elife.52649), 2019-12-18
Supplement: supp [file elife-52649-supp-v1.zip › elife_poa_e52649_Figure_2_figure_supplement_1_source_data_1.pdf]

**$k_{on}$**

| A3G | Salt Concentration  | Force (pN) | Average (1/s) | Standard Error | N |
|-----|---------------------|------------|---------------|----------------|---|
| WT  | 50 mM Na            | 20         | 0.0085        | 0.0016         | 5 |
| WT  | 50 mM Na + 10 mM Mg | 20         | 0.0027        | 0.0008         | 5 |
| WT  | 150 mM Na + 1 mM Mg | 20         | 0.0015        | 0.0002         | 7 |

**$k_{off}$**

| A3G | Salt Concentration  | Force (pN) | Average (1/s) | Standard Error | N |
|-----|---------------------|------------|---------------|----------------|---|
| FW  | 50 mM Na            | 20         | 0.013         | 0.002          | 5 |
| FW  | 50 mM Na + 10 mM Mg | 20         | 0.017         | 0.004          | 6 |
| FW  | 150 mM Na + 1 mM Mg | 20         | 0.016         | 0.001          | 5 |

Average rates, associated standard errors, and biological replications (N) for measurements of A3G binding to ( $k_{on}$ ) and dissociation from ( $k_{off}$ ) ssDNA in different buffer conditions as plotted in figure 2 supplement B&C.
