# Supplementary material for: HIV restriction factor APOBEC3G binds in multiple steps and conformations to search and deaminate single-stranded DNA
Source: eLife journal article supplement (doi:10.7554/elife.52649), 2019-12-18
Supplement: supp [file elife-52649-supp-v1.zip › elife_poa_e52649_Figure_2_source_data_1.pdf]

**$k_{on}$** 

| A3G | Force (pN) | Average (1/s) | Standard Error | N |
|-----|------------|---------------|----------------|---|
| WT  | 10         | 0.0065        | 0.0014         | 5 |
| WT  | 20         | 0.0085        | 0.0016         | 5 |
| WT  | 35         | 0.0051        | 0.0010         | 5 |
| WT  | 50         | 0.0032        | 0.0005         | 5 |
| WT  | 65         | 0.0021        | 0.0008         | 5 |
| WT  | 80         | 0.0021        | 0.0007         | 5 |

 **$k_{off}$** 

| A3G | Force | Average (1/s) | Standard Error | N |
|-----|-------|---------------|----------------|---|
| WT  | 50    | 0.014         | 0.002          | 5 |
| WT  | 65    | 0.012         | 0.003          | 3 |
| WT  | 80    | 0.014         | 0.002          | 3 |
| FW  | 20    | 0.013         | 0.002          | 5 |
| FW  | 35    | 0.016         | 0.003          | 3 |
| FW  | 50    | 0.015         | 0.002          | 4 |
| FW  | 65    | 0.015         | 0.003          | 3 |
| FW  | 80    | 0.014         | 0.004          | 3 |

Average rates, associated standard errors, and biological replications (N) for measurements of A3G binding to ( $k_{on}$ ) and dissociation from ( $k_{off}$ ) ssDNA as plotted in figure 2C&F.
