# Supplementary material for: HIV restriction factor APOBEC3G binds in multiple steps and conformations to search and deaminate single-stranded DNA
Source: eLife journal article supplement (doi:10.7554/elife.52649), 2019-12-18
Supplement: supp [file elife-52649-supp-v1.zip › elife_poa_e52649_Figure_3_source_data_1.pdf]

### Extension Change

| Force | Average<br>(nm/nt) | Standard<br>Error | N |
|-------|--------------------|-------------------|---|
| 10    | 0.0172             | 0.0030            | 5 |
| 20    | 0.0168             | 0.0018            | 5 |
| 35    | 0.0103             | 0.0014            | 5 |
| 50    | 0.0052             | 0.0011            | 5 |
| 65    | 0.0046             | 0.0005            | 5 |
| 80    | 0.0045             | 0.0005            | 5 |

Average extension change, associated standard errors, and biological replications (N) for measurements of A3G binding to ( $k_{on}$ ) and dissociation from ( $k_{off}$ ) ssDNA as plotted in figure 3A.
