# Supplementary material for: HIV restriction factor APOBEC3G binds in multiple steps and conformations to search and deaminate single-stranded DNA
Source: eLife journal article supplement (doi:10.7554/elife.52649), 2019-12-18
Supplement: supp [file elife-52649-supp-v1.zip › elife_poa_e52649_Figure_4_source_data_1.pdf]

### Observed re-equilibration rate

| Force | Average<br>(1/s) | Standard<br>Error | N  |
|-------|------------------|-------------------|----|
| 10    | 0.49             | 0.05              | 9  |
| 15    | 0.25             | 0.06              | 6  |
| 20    | 0.20             | 0.03              | 7  |
| 35    | 0.19             | 0.02              | 7  |
| 50    | 0.26             | 0.02              | 6  |
| 65    | 0.33             | 0.03              | 7  |
| 80    | 0.48             | 0.08              | 12 |

Average rates, associated standard errors, and biological replications (N) for measurements of re-equilibration of an A3G saturated ssDNA after force jump as plotted in figure 4C.
