# Supplementary material for: HIV restriction factor APOBEC3G binds in multiple steps and conformations to search and deaminate single-stranded DNA
Source: eLife journal article supplement (doi:10.7554/elife.52649), 2019-12-18
Supplement: supp [file elife-52649-supp-v1.zip › elife_poa_e52649_Figure_5_source_data_1.pdf]

**A3G binding to ssDNA-dsDNA hybrid construct at low forces**

| Force (pN) | Average $\Delta$ Extension (nm/nt) | Standard Error | Average Rate (1/s) | Standard Error | N |
|------------|------------------------------------|----------------|--------------------|----------------|---|
| 4          | 0.097                              | 0.009          | 0.025              | 0.011          | 5 |
| 8          | 0.053                              | 0.005          | 0.034              | 0.012          | 5 |
| 12         | -0.032                             | 0.007          | 0.098              | 0.035          | 5 |
| 16         | -0.025                             | 0.005          | 0.144              | 0.048          | 5 |

Average extension changes, rates, associated standard errors, and biological replications (N) for measurements of A3G binding to ssDNA at low forces as plotted in figure 5C&D.
