# Supplementary material for: HIV restriction factor APOBEC3G binds in multiple steps and conformations to search and deaminate single-stranded DNA
Source: eLife journal article supplement (doi:10.7554/elife.52649), 2019-12-18
Supplement: supp [file help.docx]

Meka Hadapan !!!!!!!!!
