# Supplementary figures and images for: HIV restriction factor APOBEC3G binds in multiple steps and conformations to search and deaminate single-stranded DNA
Source: eLife journal article supplement (doi:10.7554/elife.52649), 2019-12-18

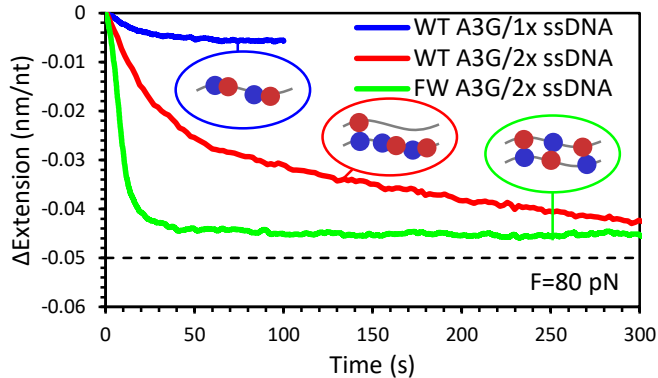

Supplement: supp [file elife-52649-supp-v1.zip]

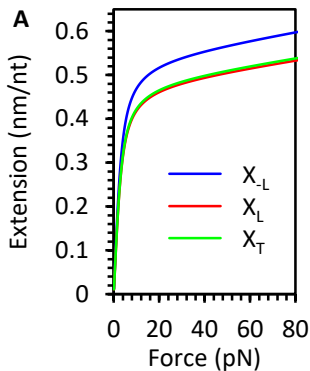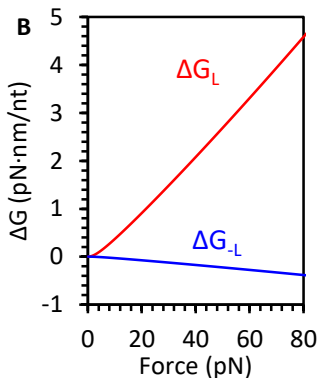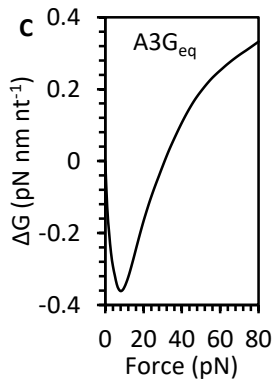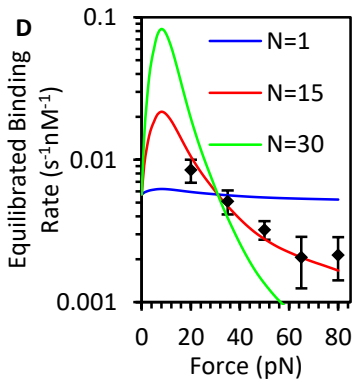

Supplement: supp [file elife-52649-supp-v1.zip]

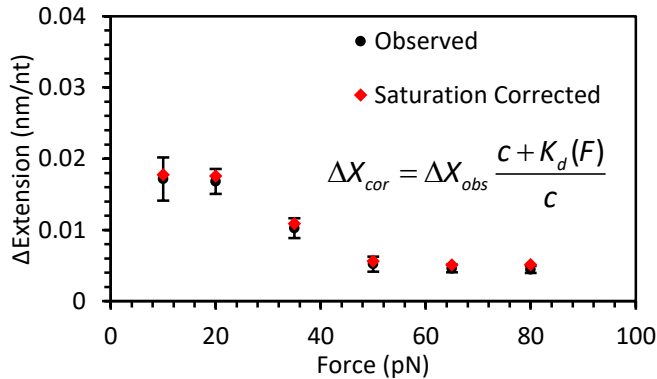

Supplement: supp [file elife-52649-supp-v1.zip › elife_poa_e52649_Figure_3_figure_supplement_1.pdf]

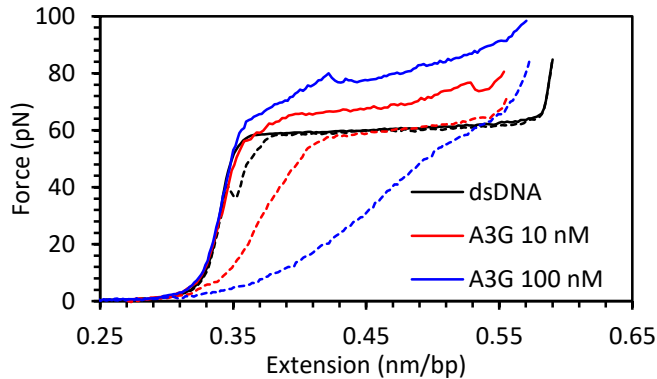

Supplement: supp [file elife-52649-supp-v1.zip › elife_poa_e52649_Figure_5_figure_supplement_2.pdf]

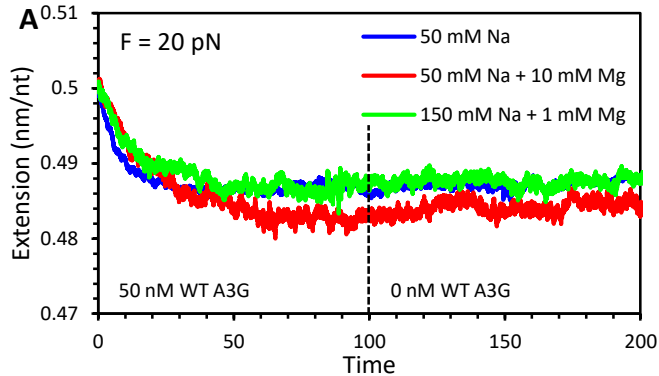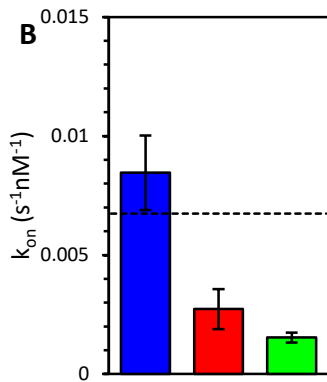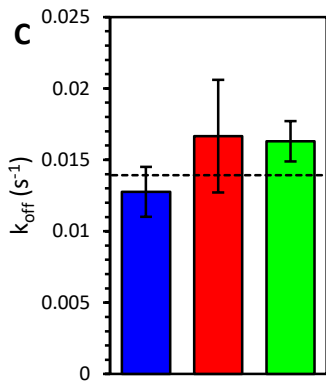

Supplement: supp [file elife-52649-supp-v1.zip › elife_poa_e52649_Figure_2_figure_supplement_1.pdf]

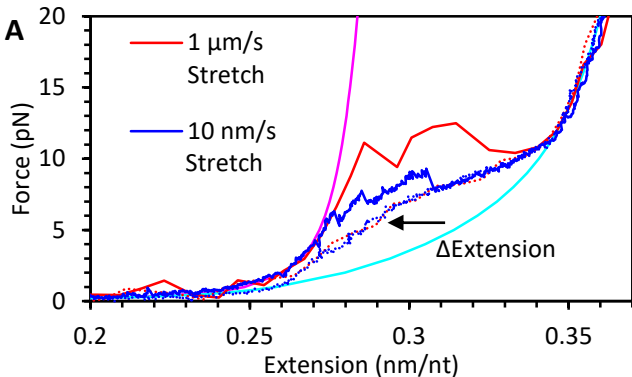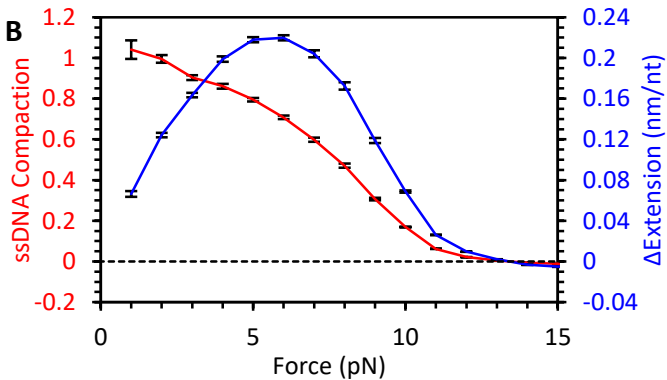

Supplement: supp [file elife-52649-supp-v1.zip › elife_poa_e52649_Figure_5_figure_supplement_1.pdf]

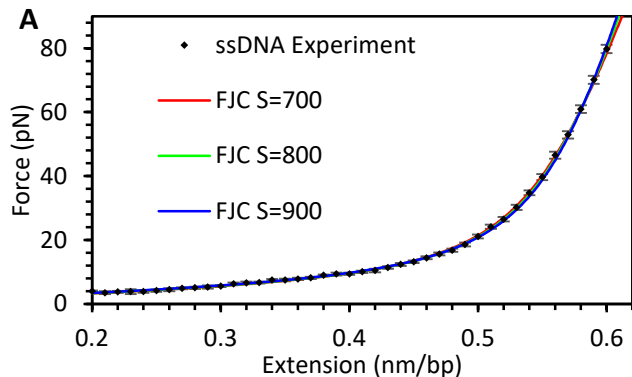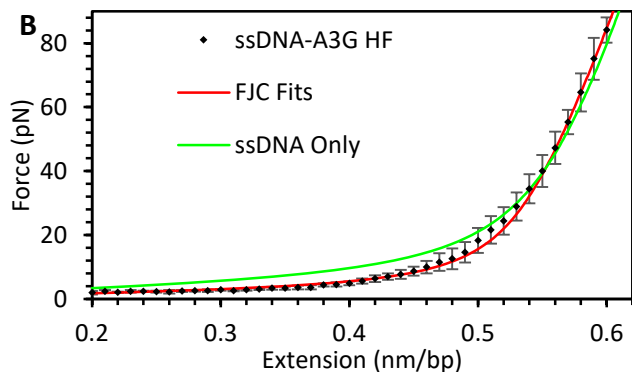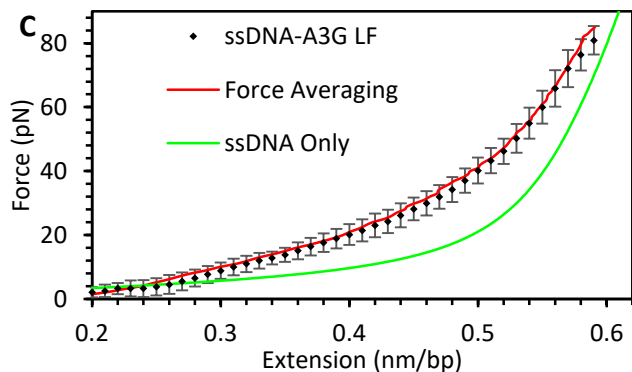

Supplement: supp [file elife-52649-supp-v1.zip › elife_poa_e52649_Figure_1_figure_supplement_1.pdf]
